# Supplementary material for: NRF-1 directly regulates TFE3 and promotes the proliferation of renal cancer cells
Source: PubMed Central journal article supplement — Oncol Lett. 2021 Jul 22;22(3):679. doi: 10.3892/ol.2021.12940 (PMC8323008; doi:10.3892/ol.2021.12940), 2021-07-22

Figure S1. TFE3-OE plasmid up-regulates the expression of TFE3 protein. (A) In cells transfected with TFE3-OE, TFE3 protein expression increased compared with TFE3-NC. (B) Semi-quantitative analysis of protein expression. \* $P < 0.05$ . TFE3, transcription factor binding to IGHM enhancer 3; OE, overexpression; NC, negative control.

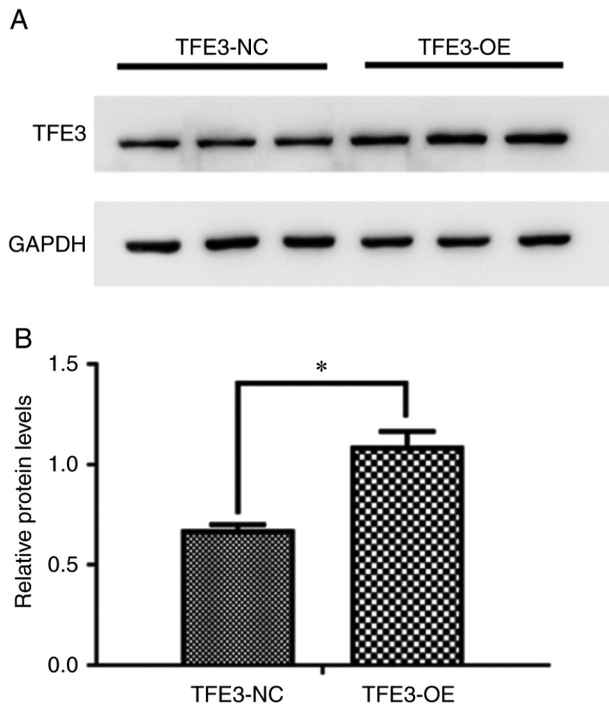

Supplement: Supplementary_Data.pdf [file Supplementary_Data.pdf]
